# Supplementary material for: Concerted aryl-sulfur reductive elimination from PNP pincer-supported Co(iii) and subsequent Co(i)/Co(iii) comproportionation
Source: Chem Sci. 2020 May 19;11(23):6075–84. doi: 10.1039/d0sc01813a (PMC7480512; doi:10.1039/d0sc01813a)
Supplement: Supplementary file 2 [file SC-011-D0SC01813A-s002.xlsx]

## Sheet: Sheet1
	H_M06	G_M06	E_M06	G addition	H addition	627.51
CoPh (2a)	-2128.47	-2128.58	-2129.21	0.62188	0.739117
CoSPh (3a)	-2526.7	-2526.82	-2527.44	0.621177	0.743554
Co(Ph)(SPh) (6a)	-2758.08	-2758.21	-2758.92	0.709883	0.840213
Co(Ph)(SPh)-TS (TS)	-2758.04	-2758.17	-2758.88	0.710117	0.838446
Co dimer (7)	-3794.12	-3794.3	-3795.4	1.10157	1.2873
Co singlet (12s)	-1897.02	-1897.12	-1897.66	0.536724	0.642607
Co triplet (12t)	-1897.04	-1897.15	-1897.68	0.535365	0.642498
Co(SPh2) singlet (13s)	-2758.07	-2758.21	-2758.91	0.703464	0.839157
Co(SPh2) triplet (13t)	-2758.09	-2758.23	-2758.93	0.70074	0.83887
SPh2 (A)	-861.035	-861.086	-861.23	0.143612	0.194398
FC6H4	-330.589	-330.625	-330.675	0.050189	0.085648
iPrC6H4S	-747.368	-747.416	-747.555	0.139	0.186661
iPrC6H4	-349.132	-349.176	-349.315	0.138243	0.182254
FC6H4S	-728.828	-728.867	-728.918	0.051017	0.090084
Energies calculated as indicated in the SI.
Co = (PNP)Co for brevity
The values of H, G, and E above are given in eV, cell G3 is the conversion factor to kcal/mol
				ΔH, kcal/mol	ΔG, kcal/mol
			Co(Ph)(SPh) --> TS	23.5071	24.7628
			Co(Ph)(SPh) --> Co(SPh2) singlet	3.76812	0.402786
			Co(Ph)(SPh) --> Co(SPh2) triplet	-4.55939	-9.45396
			Co(Ph)(SPh) --> Co singlet + SPh2	18.4144	1.88641
			Co(Ph)(SPh) --> Co triplet + SPh2	3.74082	-13.5715
			Co singlet --> Co triplet	-14.6736	-15.458
			Co(SPh2) singlet --> Co(SPh2) triplet	-8.32751	-9.85675
			Co(SPh2) singlet --> Co singlet + SPh2	14.6463	1.48363
			Co(SPh2) singlet --> Co triplet + SPh2	-0.0273017	-13.9743
			Co(SPh2) triplet --> Co triplet + SPh2	8.30021	-4.11758
			2Co(Ph)(SPh) --> CoPh + CoSPh + SPh2	-25.4969	-44.159
			Co(Ph)(SPh) + Co(SPh2) triplet --> CoPh + CoSPh + SPh2	-20.9375	-34.705
			Co(Ph)(SPh) + Co triplet --> CoPh + CoSPh	-29.2377	-30.5874
			FC6H4 + SC6H4iPr --> FC6H4S + C6H4iPr	-1.59595	-1.5696
			2 Co triplet --> Co dimer	-23.5703	-5.66244
			1/2 Co dimer + Co(Ph)(SPh) --> CoPh + CoSPh	-17.4525	-27.7562
			1/2 Co dimer + Ph2S --> 1/2 CoPh + 1/2 CoSPh	-4.70409	-5.67673
